# Supplementary material
Source: Royal Society of Chemistry journal article supplement (doi:10.1039/d6gc02352e)
Supplement: d6gc02352e1.pdf [file d6gc02352e1.pdf]

## Supporting Information

### **Solvent-free all-bio-based underwater adhesive featuring degradability and closed-loop recycling**

Yaya Sun <sup>a</sup>, Yujiao Bi <sup>a</sup>, Xuming Liu <sup>b</sup>, Xiuyan Ren <sup>a</sup>, Qin Zhang <sup>\*b</sup>, and Xin Liu <sup>\*a</sup>

<sup>a</sup> Key Laboratory of Polymeric and Soft Materials, School of Chemical Engineering and Advanced Institute of Materials Science, Changchun University of Technology, Changchun 130012, China.

<sup>b</sup> Key Laboratory of Polymeric and Soft Materials, School of Chemistry and Life Science and Advanced Institute of Materials Science, Changchun University of Technology, Changchun 130012, China.

Corresponding author: Xin Liu, Qin Zhang

E-mail: [liuxin@ccut.edu.cn](mailto:liuxin@ccut.edu.cn); [zhangqin@ccut.edu.cn](mailto:zhangqin@ccut.edu.cn)

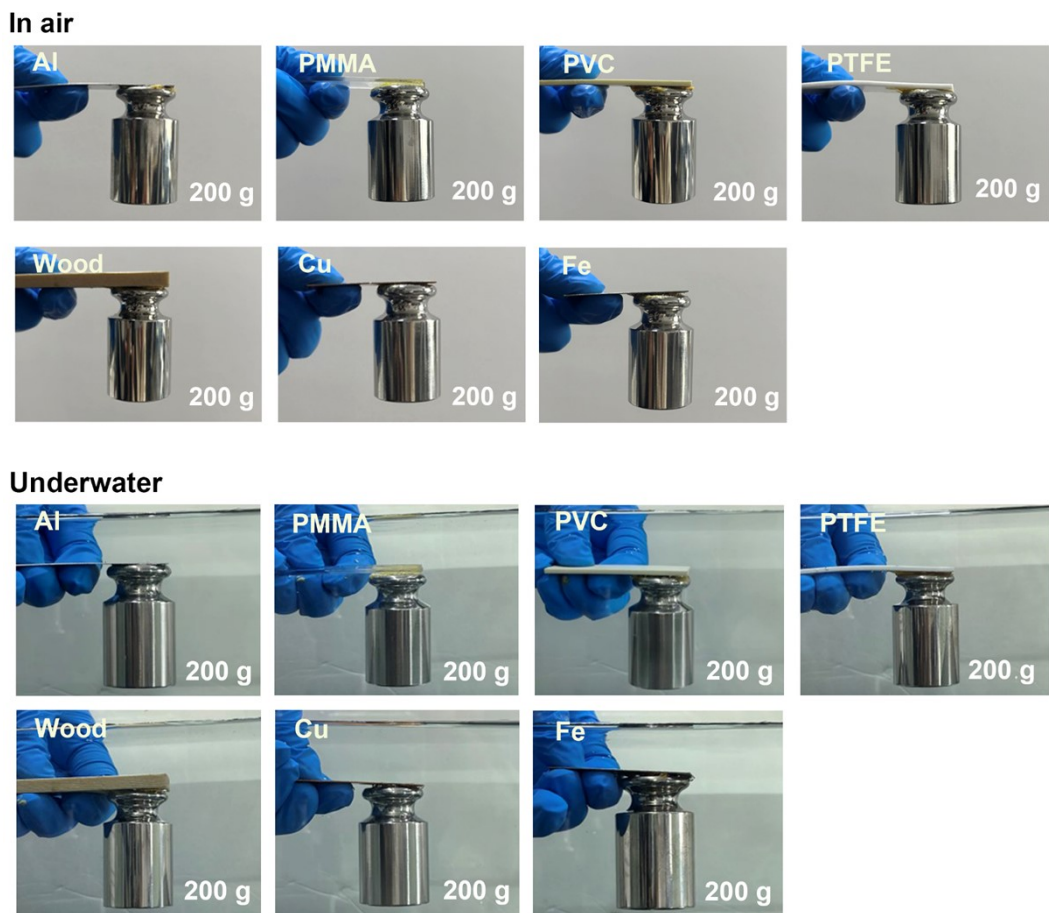

**Fig. S1.** The adhesion exhibition of PTA-Zein adhesive on different substrates in air and underwater.

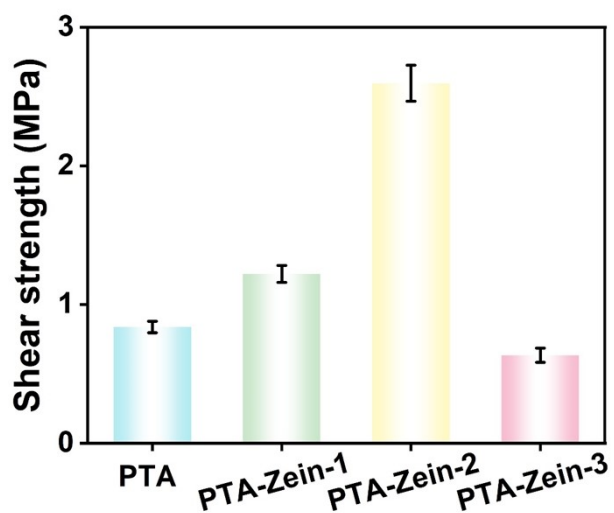

**Fig. S2.** The shear adhesion strength of PTA-Zein adhesive with different ratios of zein to TA.

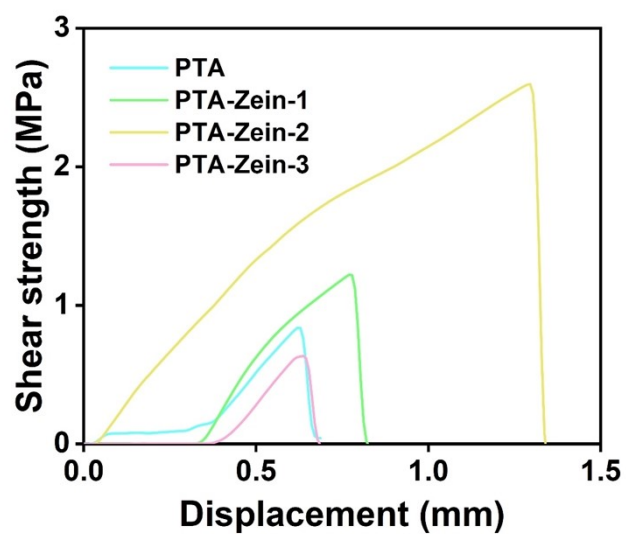

**Fig. S3.** The shear adhesion strength curves of PTA-Zein adhesive with different ratios of zein to TA.

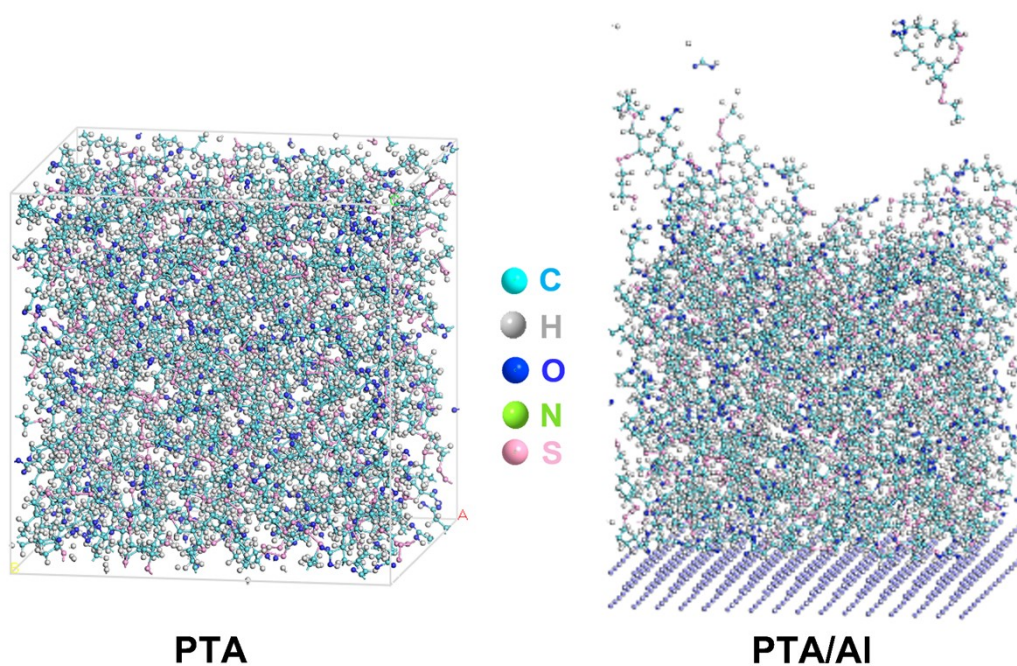

**Fig. S4.** The PTA adhesive system and its interfacial bonding on Al sheets at 298 K.

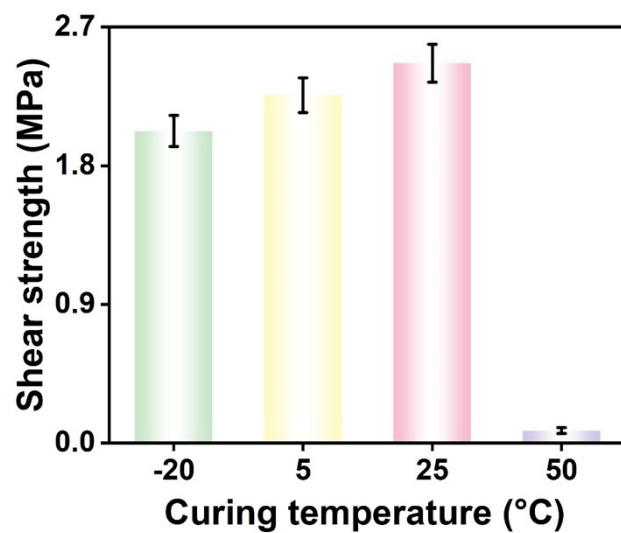

**Fig. S5.** The shear adhesion strength of PTA-Zein adhesive at different curing temperatures.

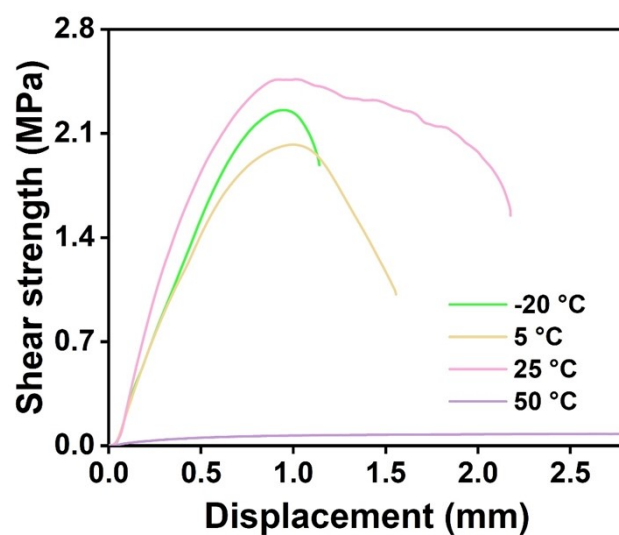

**Fig. S6** The shear adhesion strength curves of PTA-Zein adhesive at different curing temperatures.

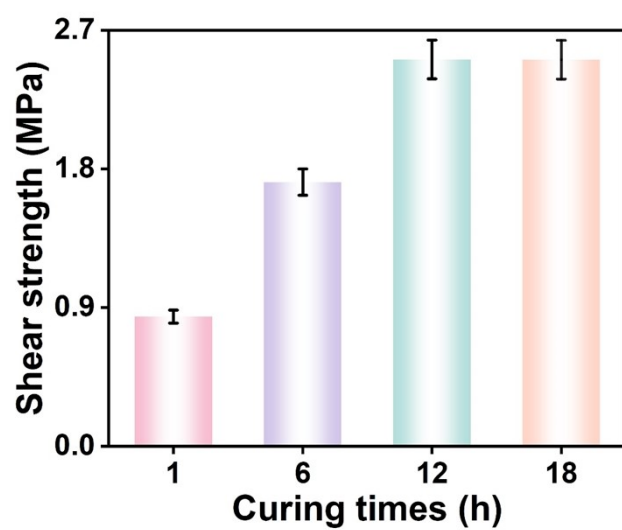

**Fig. S7.** The shear adhesion strength of PTA-Zein adhesive at different curing times.

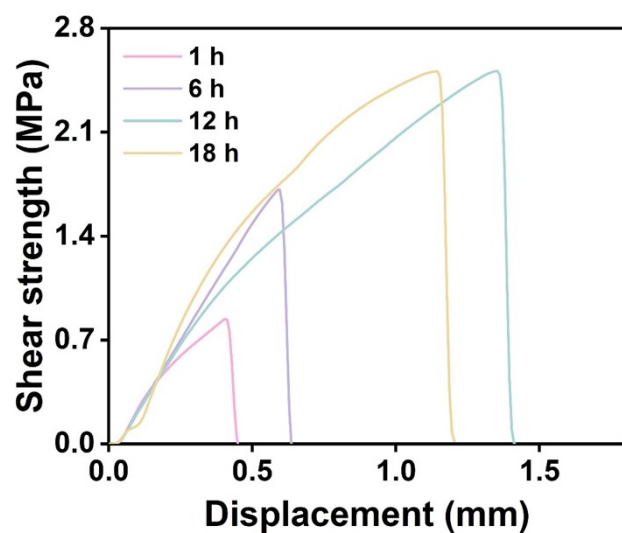

**Fig. S8.** The shear adhesion strength curves of PTA-Zein adhesive at different curing times.

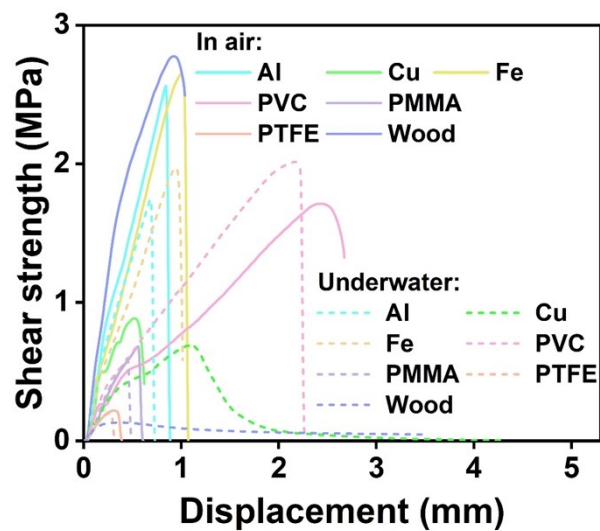

**Fig. S9.** The shear adhesion strength curves of PTA-Zein adhesive with different substrates in air and underwater.

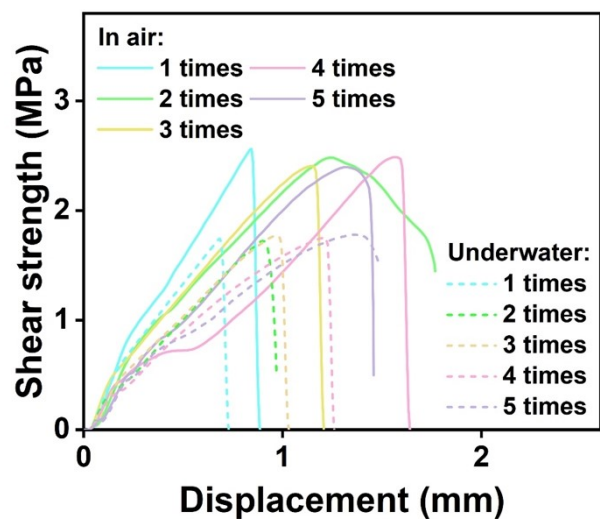

**Fig. S10.** The shear adhesion strength curves of PTA-Zein adhesive for five times adhesion cycles in air and underwater.

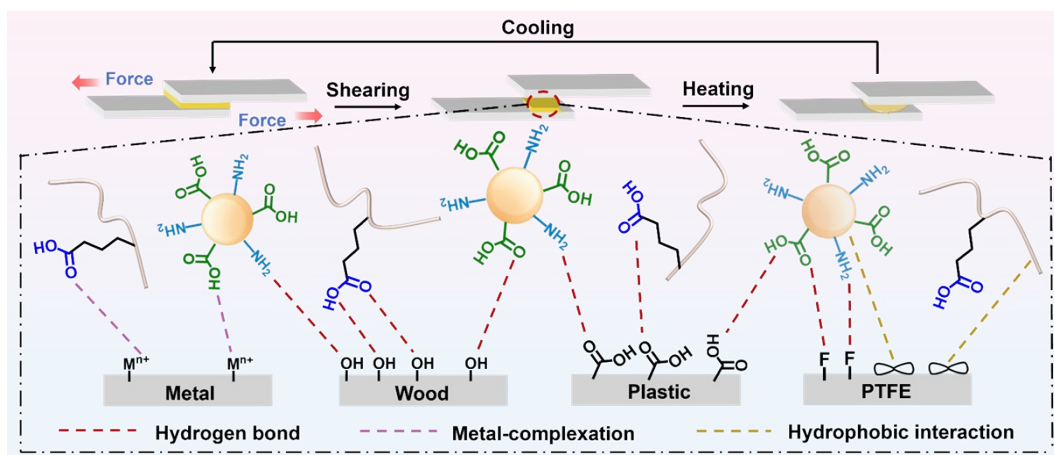

Fig. S11. Hot-melt recycling process and adhesion mechanism of PTA-Zein adhesive.

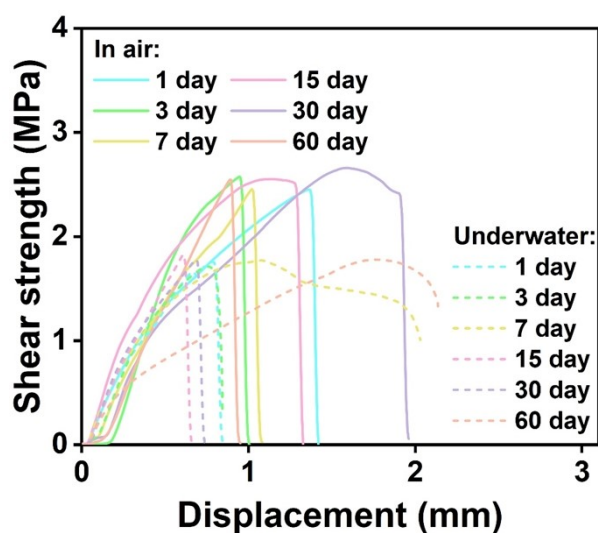

Fig. S12. The shear adhesion strength curves of PTA-Zein adhesive with different storage times in air and underwater.

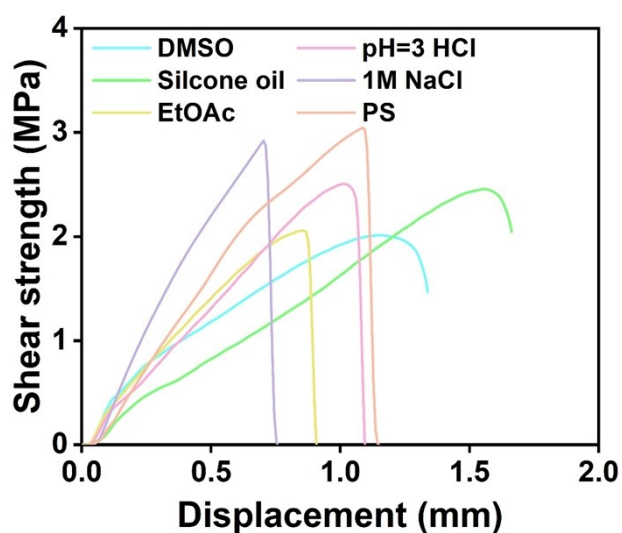

Fig. S13. The shear adhesion strength curves of PTA-Zein adhesive in different

solvents for 2 days.

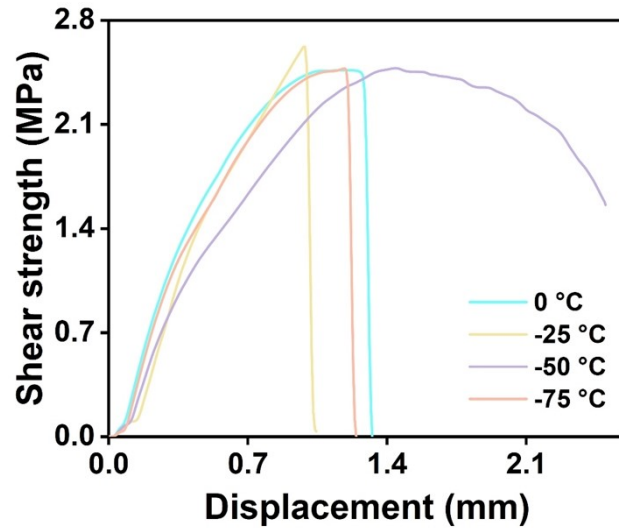

**Fig. S14.** The shear adhesion strength curves of PTA-Zein adhesive in different low-temperature environments for 2 days.

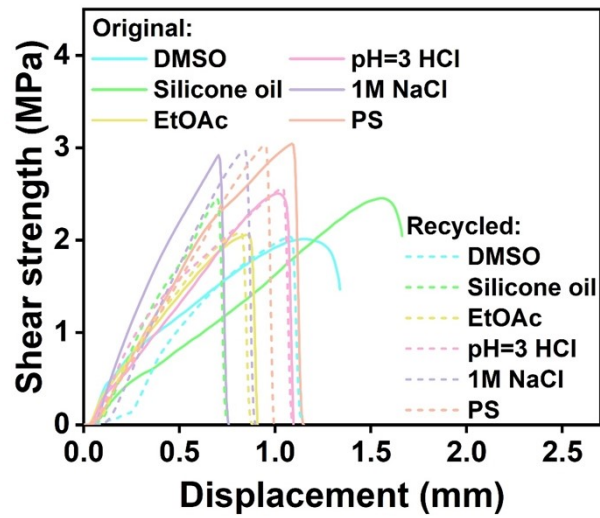

**Fig. S15.** Comparison of adhesion strength curves in different solvents after immersing for 2 days between the original and recycled PTA-Zein adhesive.

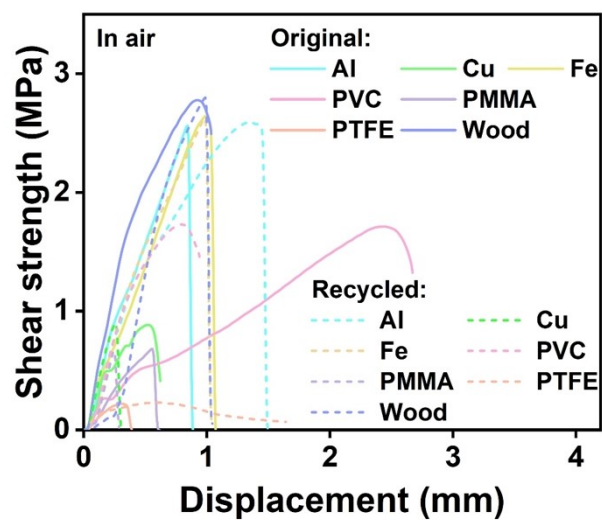

**Fig. S16.** Comparison of adhesion strength curves on various substrates between the original and recycled PTA-Zein adhesive in air.

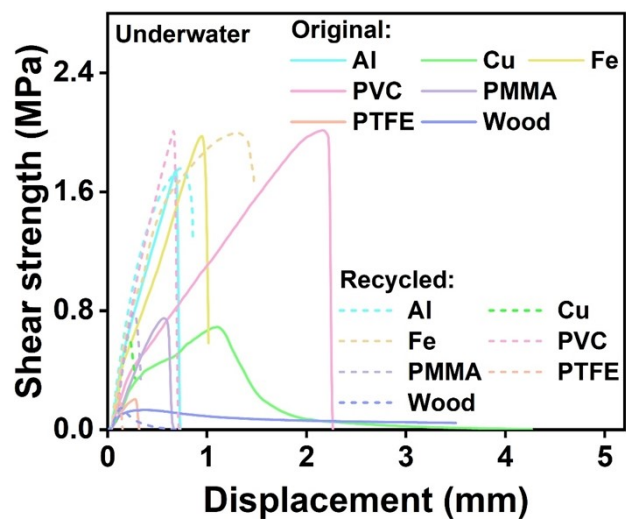

**Fig. S17.** Comparison of underwater adhesion strength curves on various substrates between the original and recycled PTA-Zein adhesive.

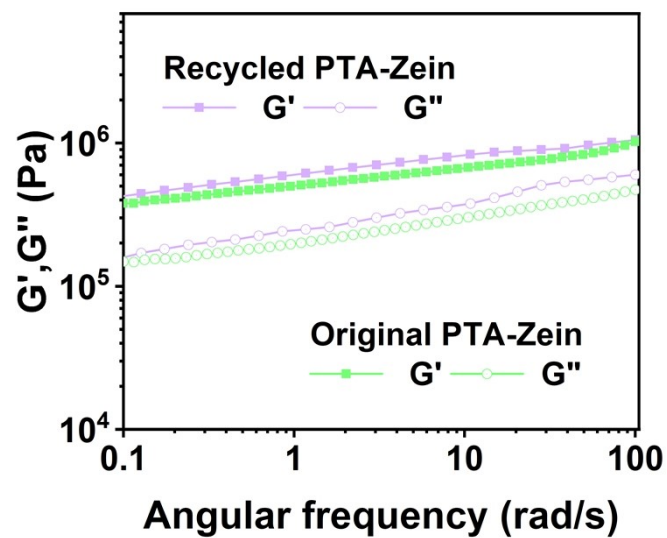

Fig. S18. Frequency dependency of storage and loss modulus of original and recycled PTA-Zein adhesive.

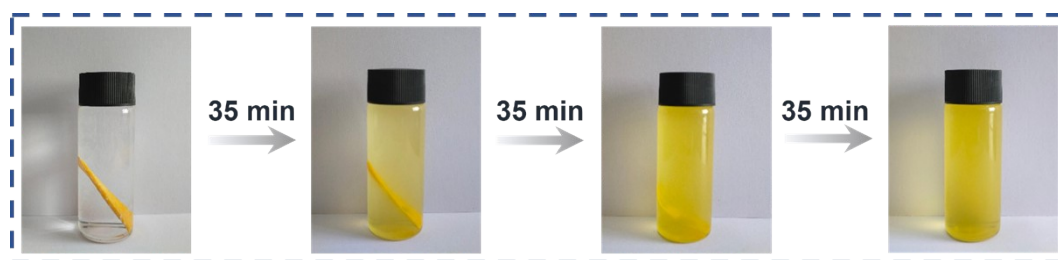

Fig. S19. Degradation of PTA-Zein adhesive in 0.5 M NaOH solution.

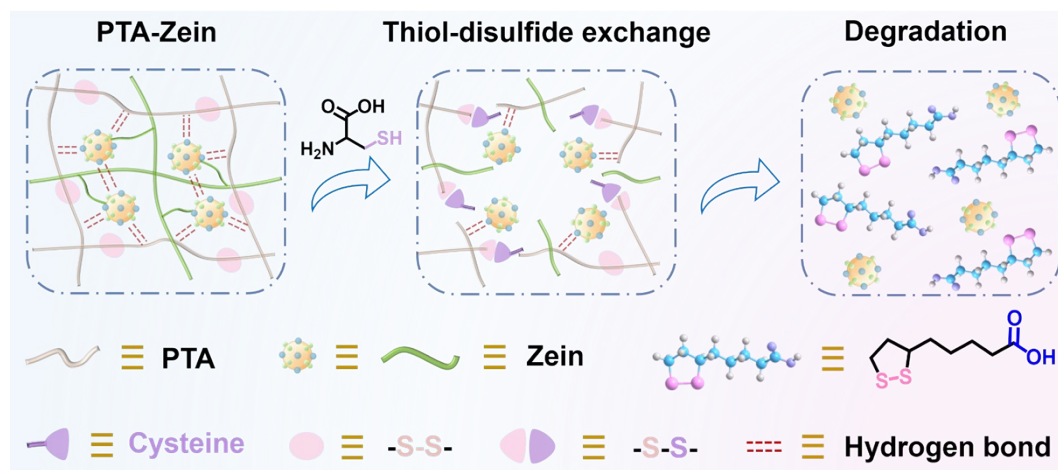

Fig. S20. Degradation mechanism of PTA-Zein adhesive in PBS with 10 mM cysteine solution.

Life Cycle Analysis:

PTA-Zein adhesive synthesis and recycling of TA process:

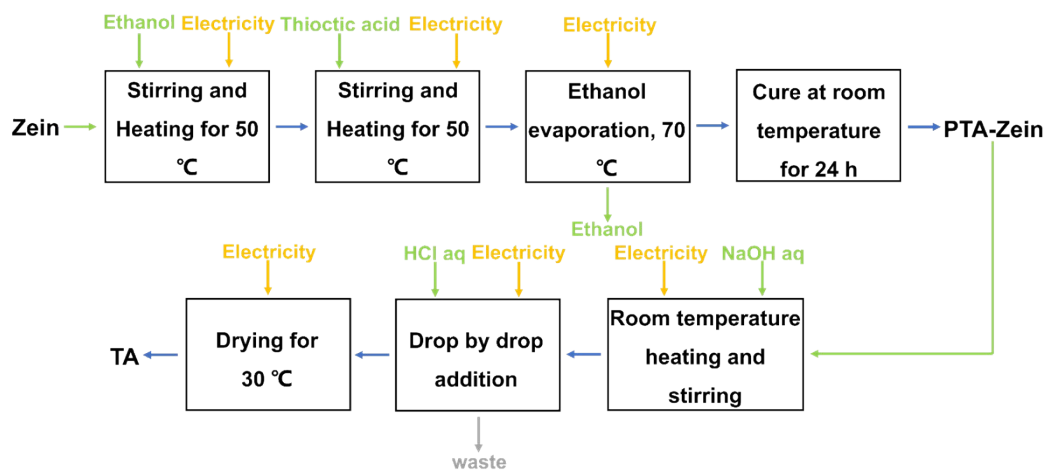

**Fig. S21.** Flowchart of PTA-Zein adhesive synthesis and TA recycling. Materials are highlighted in green; electricity use is highlighted in yellow; waste materials are highlighted in grey. Boxes contain process within the procedure, blue arrows indicate the next step in the procedure.

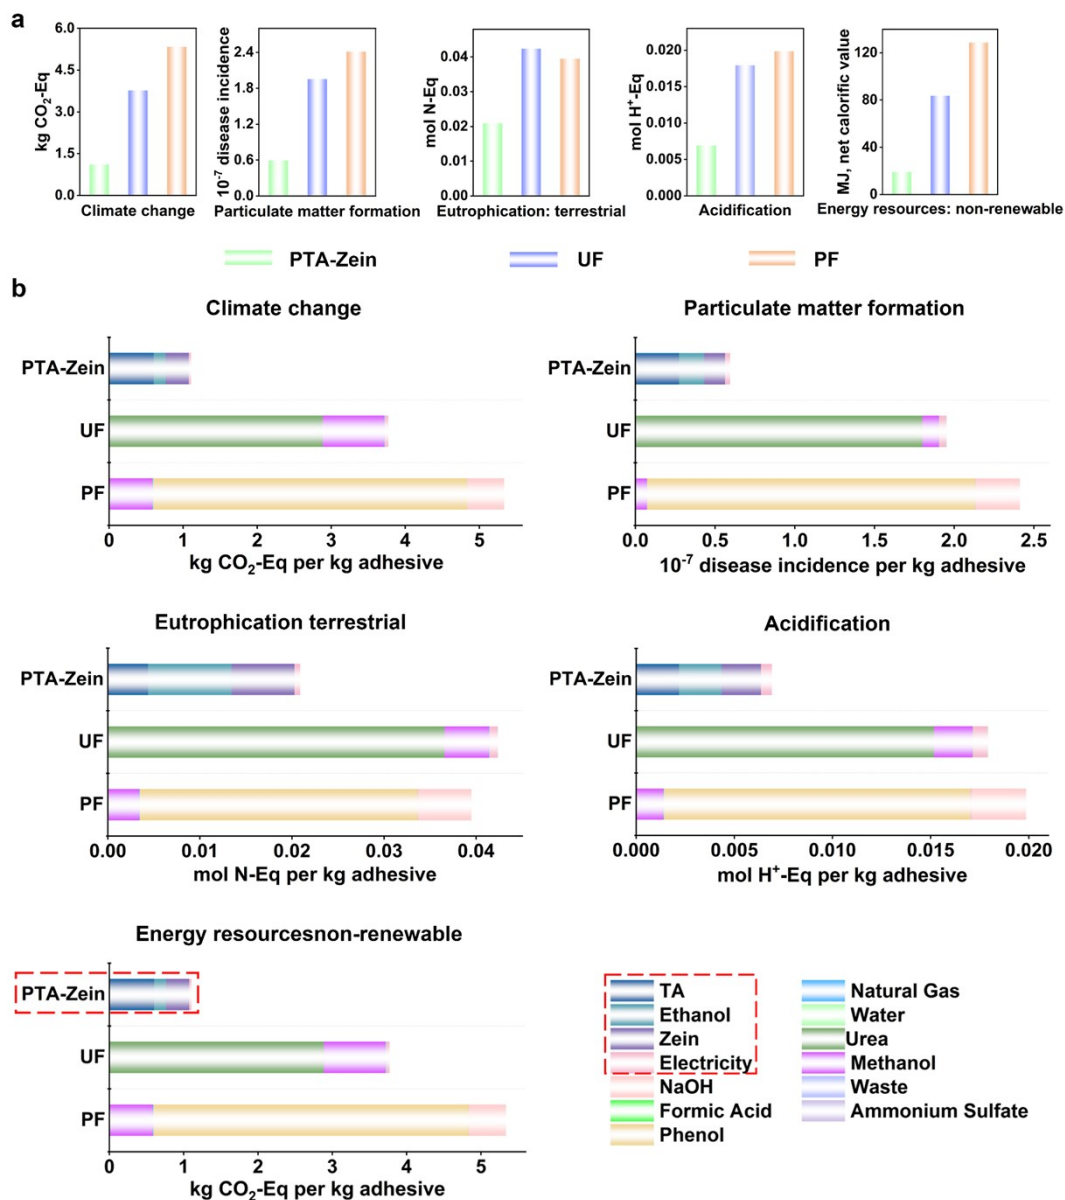

**Fig. S22.** (a) Environmental impacts of PTA-Zein compared to petroleum-based UF and PF, (b) disaggregated impacts of PTA-Zein, UF, and PF across the five relevant categories.

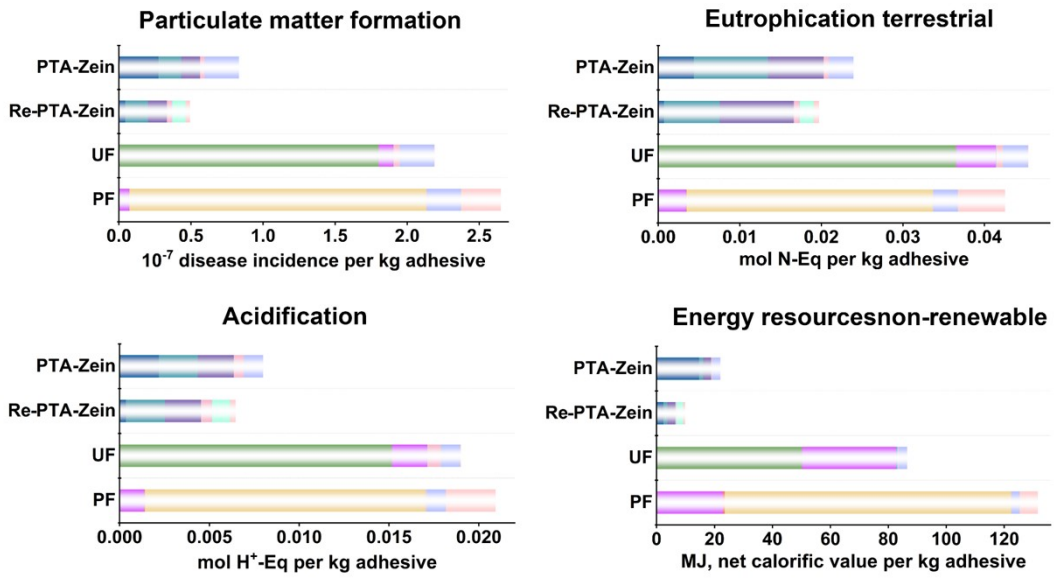

**Fig. S23.** Disaggregated impacts of PTA-Zein, Re-PTA-Zein, UF, and PF across the four relevant categories.

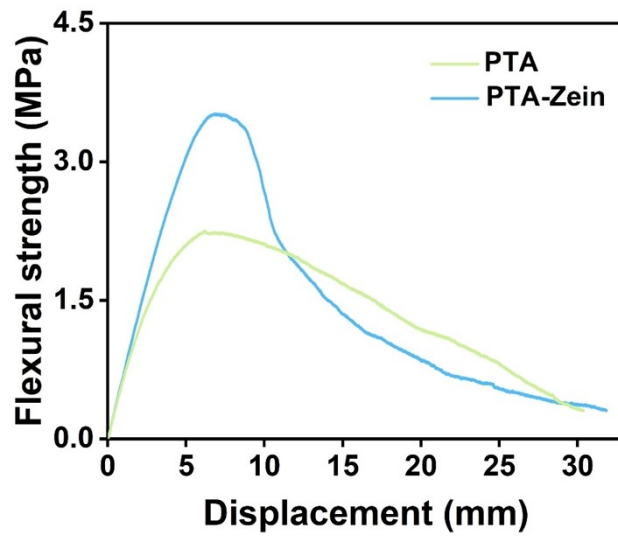

**Fig. S24.** The flexural strength curves of particleboard bonded with PTA and PTA-Zein adhesives.

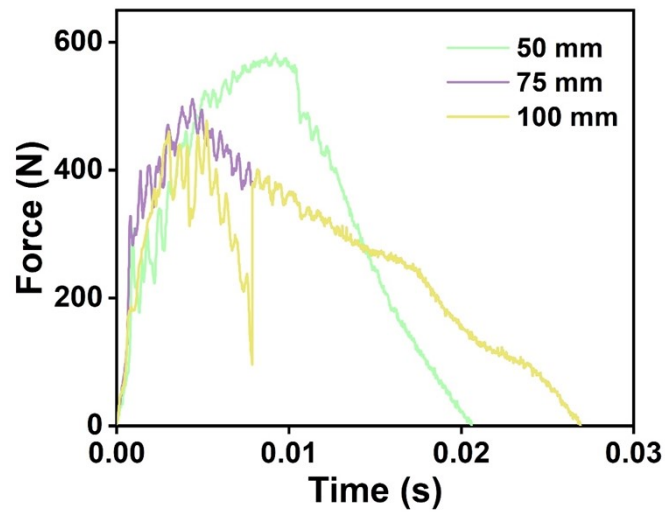

**Fig. S25.** The reaction force curves of the PTA-Zein adhesive-bonded particleboard under different hammer drop heights.

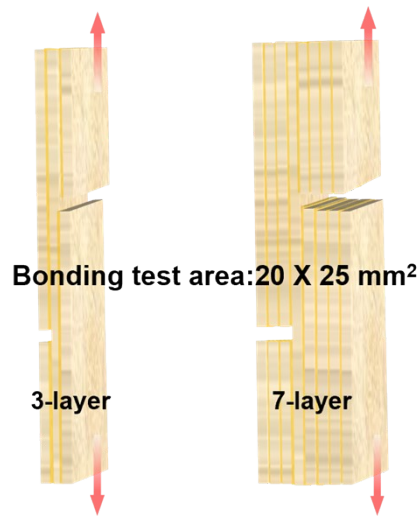

**Fig. S26.** Photograph of shear strength test specimen from multi-layer plywood.

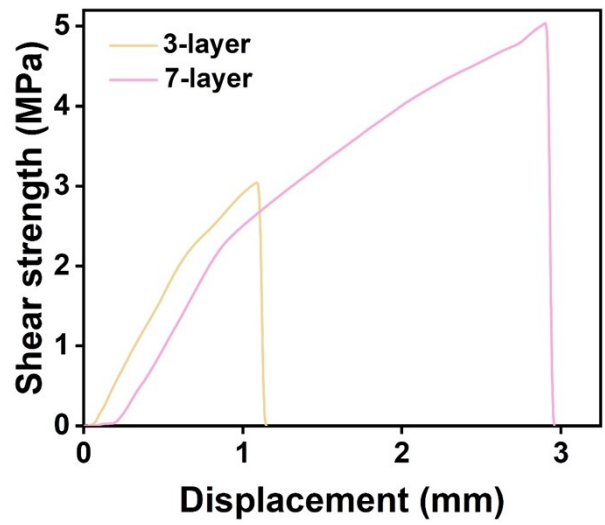

**Fig. S27.** The shear adhesion strength curves of multi-layer plywood.
